# Supplementary material for: Incidence of Cytomegalovirus disease and viral replication kinetics in seropositive liver transplant recipients managed under preemptive therapy in a tertiary-care center in Mexico City: a retrospective cohort study
Source: Springer Nature journal article supplement (doi:10.1186/s12879-022-07123-w), 2022-02-14
Supplement: MOESM1 [file 20131026]

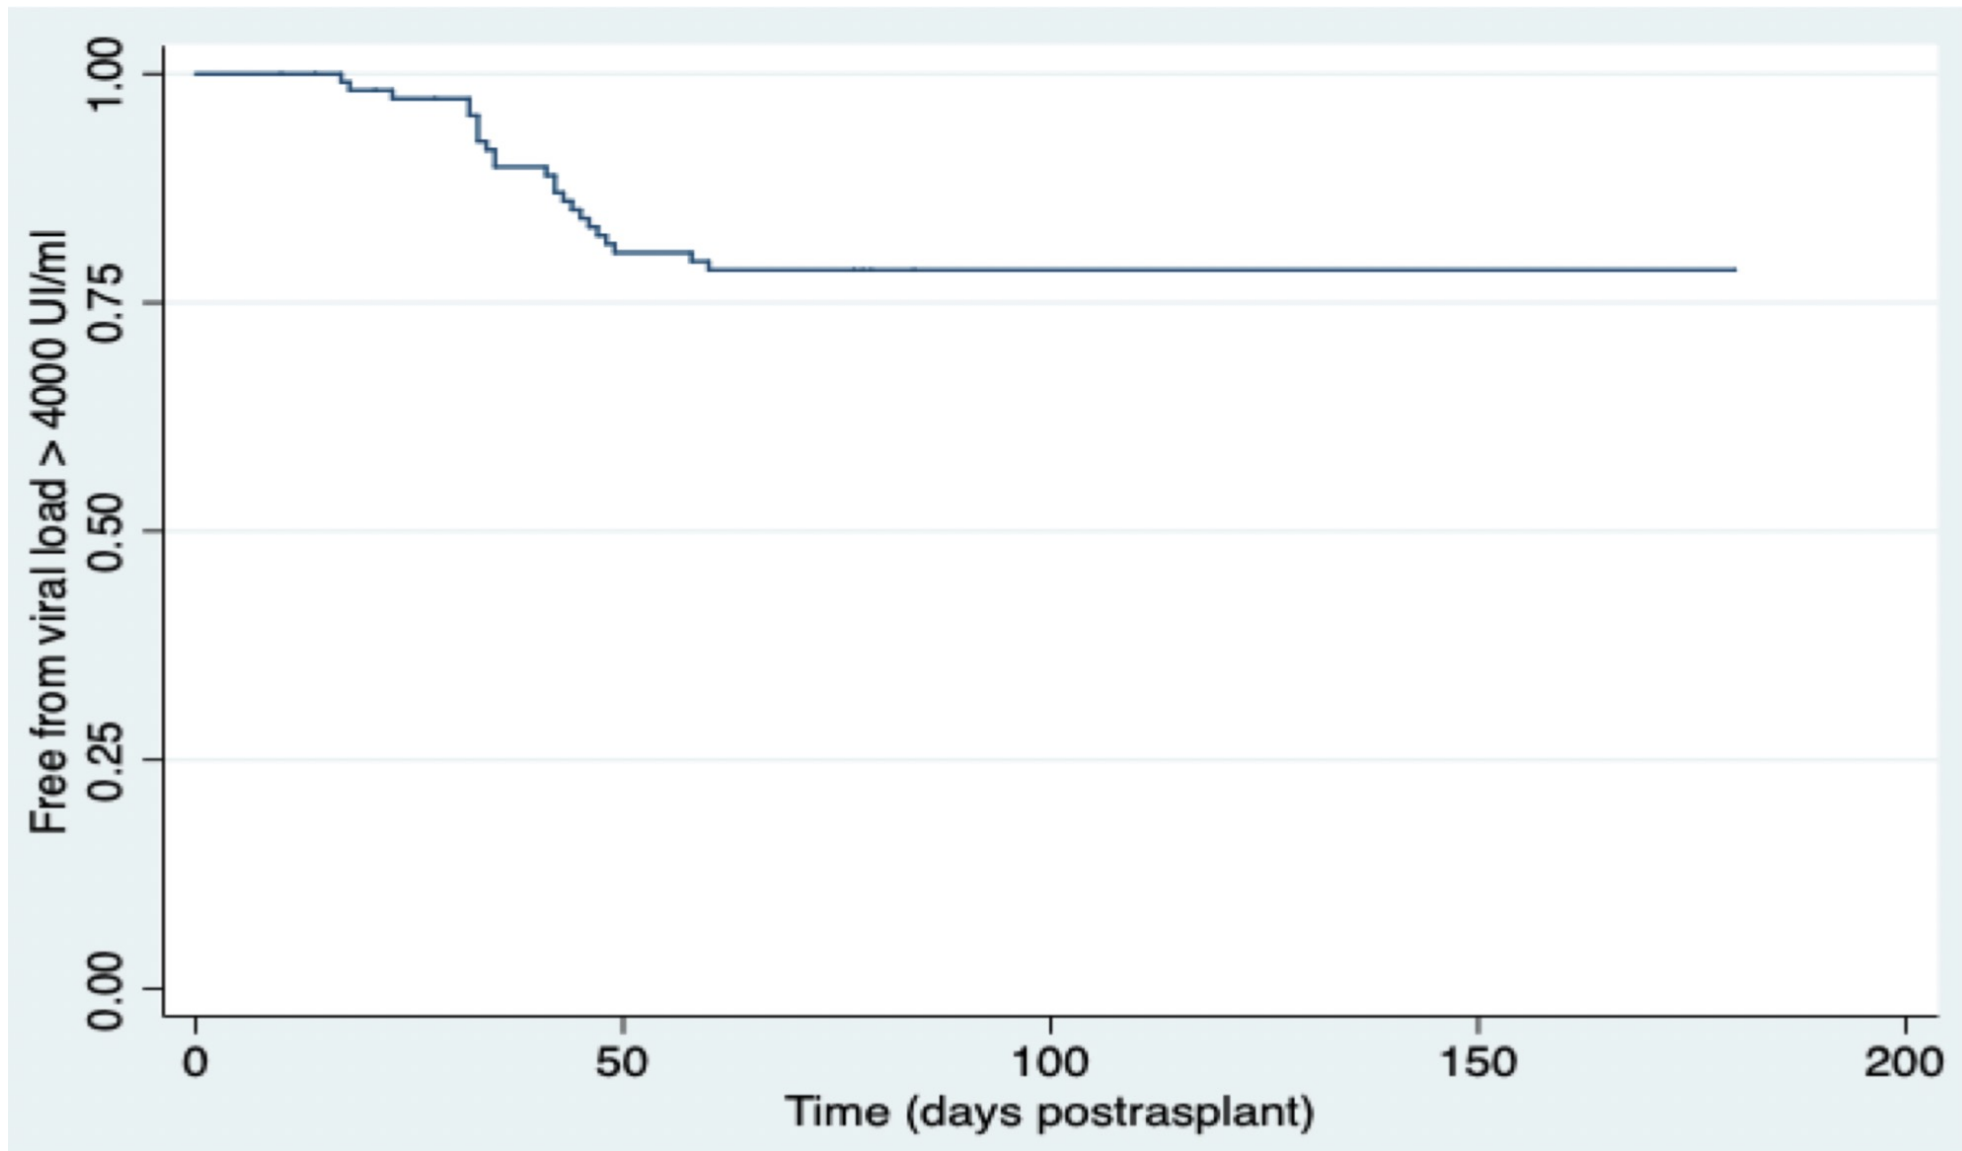

**Additional Figure S1.** Kaplan-Meier curve depicting the development of CMV DNAemia >4000 UI/ml over time in CMV seropositive recipients after liver transplantation.
