# Supplementary material for: Incidence of Cytomegalovirus disease and viral replication kinetics in seropositive liver transplant recipients managed under preemptive therapy in a tertiary-care center in Mexico City: a retrospective cohort study
Source: Springer Nature journal article supplement (doi:10.1186/s12879-022-07123-w), 2022-02-14
Supplement: MOESM2 [file 20131026]

| Time                    | W1  | W2  | W3  | W4  | W5  | W6  | W7  | W8  | W9  | W10 | Wk11 | Wk12 | M4  | M4.5 | M5  | M5.5 | M6  |
|-------------------------|-----|-----|-----|-----|-----|-----|-----|-----|-----|-----|------|------|-----|------|-----|------|-----|
| Population              | 113 | 113 | 112 | 111 | 110 | 109 | 108 | 108 | 107 | 107 | 107  | 106  | 105 | 103  | 103 | 103  | 103 |
| Percent of measurements | 91  | 83  | 65  | 65  | 68  | 56  | 58  | 56  | 75  | 50  | 53   | 44   | 58  | 54   | 52  | 36   | 49  |

**Additional Table S1:** Percentage of subjects with viral load determined. The population progressively decreased due to censoring for death, retransplantation or treatment of rejection.

W: Week, M: Month
