# Supplementary material for: Incidence of Cytomegalovirus disease and viral replication kinetics in seropositive liver transplant recipients managed under preemptive therapy in a tertiary-care center in Mexico City: a retrospective cohort study
Source: Springer Nature journal article supplement (doi:10.1186/s12879-022-07123-w), 2022-02-14
Supplement: MOESM3 [file 20131026]

| Variable                    | OR (IC95%)        | p     |
|-----------------------------|-------------------|-------|
| Age                         | 1.04 (0.98-1.1)   | 0.15  |
| Autoimmune hepatitis        | 6.93 (1.35-35.51) | 0.02  |
| MELD>20                     | 0.63 (0.17-2.3)   | 0.49  |
| Surgical time >7 hours      | 0.86 (0.17-4.17)  | 0.85  |
| >6 blood units transfused   | 0.69 (0.13-3.6)   | 0.66  |
| Grade 3 AKI                 | 0.48 (0.09-2.40)  | 0.37  |
| Viral load growth rate>0.16 | 7.35 (1.8-29.91)  | 0.005 |

**Additional Table S2.** Multivariate analysis to determine variables associated with development of viremia >4000 UI/ml. MELD: Model for End-Stage Liver Disease. AKI: Acute Kidney Injury.
